# Supplementary material for: Wound Healing Fluid Reflects the Inflammatory Nature and Aggressiveness of Breast Tumors
Source: MDPI journal article supplement (doi:10.3390/cells8020181), 2019-02-19
Supplement: s1 [file s1]

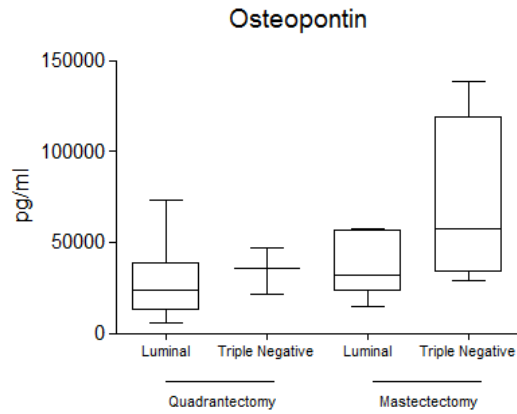

**Supplementary Figure 1. Osteopontin levels in wound healing fluids from breast carcinoma patients according with breast tumor molecular subtype and type of surgery.** Concentration (pg/ml) of Osteopontin was assessed by Bio-plex assay in 27 wound healing fluids from breast cancer patients.

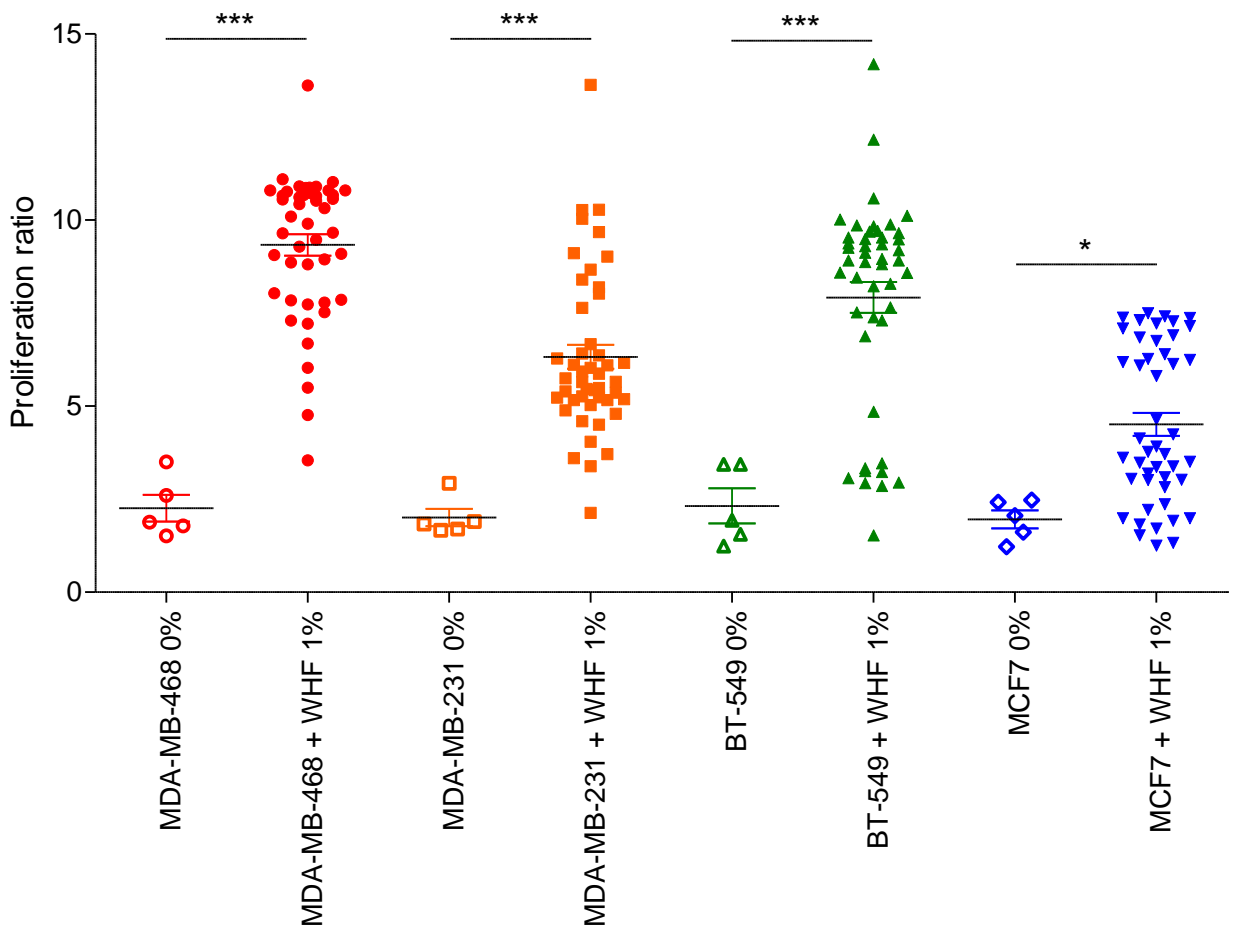

**Supplementary Figure 2. Effect of WHF on breast cancer cell proliferation.** MDA-MB-468, MDA-MB-231, BT-549 and MCF-7 breast cancer cell lines were starved for 24 h (0% FBS) and then treated for 96 h with 1% of 45 WHFs. Data about chemotherapy or hormone therapy before surgery were not known. Relative 2D-cell growth was measured by sulforhodamine B (SRB) assay. Ability of WHF to induce proliferation was indicated as the OD of each cell line after 4 days of treatment (96 h) divided by the optical density before WHF treatment. 0% represents the growth index of cells cultured for 4 days in absence of WHF (n=5). (\* p value  $\leq 0.05$ ; \*\*\* p value  $< 0.0001$ ; Unpaired t test).

**Supplementary Table 1.** Clinical characteristics of breast cancer patients from which wound healing fluids have been derived.

|                          | Overall cohort<br>(N= 27) |
|--------------------------|---------------------------|
| <b>Surgery</b>           |                           |
| Quadrantectomy           | 16 (59%)                  |
| Mastectomy               | 11 (41%)                  |
| <b>Histology</b>         |                           |
| In situ                  | 5 (19%)                   |
| Invasive                 | 22 (81%)                  |
| <b>Intrinsic subtype</b> |                           |
| Luminal                  | 18 (67%)                  |
| Triple-Negative          | 9 (33%)                   |
| <b>Size</b>              |                           |
| <2 cm                    | 17 (63%)                  |
| ≥2 cm                    | 9 (33%)                   |
| na                       | 1                         |
| <b>Grade</b>             |                           |
| 2                        | 15 (56%)                  |
| 3                        | 12 (44%)                  |
| <b>Lymph node</b>        |                           |
| N neg                    | 16 (59%)                  |
| N pos                    | 11 (41%)                  |

**Supplementary Table 2.** Clinical characteristics of breast cancer patients from which wound healing fluids have been derived according with the extend of surgery.

|                          | Overall cohort<br>(N= 27) | Quadrantectomy<br>(N= 16) | Mastectomy<br>(N= 11) | P value <sup>a</sup> |
|--------------------------|---------------------------|---------------------------|-----------------------|----------------------|
| <b>Histology</b>         |                           |                           |                       |                      |
| In situ                  | 5 (19%)                   | 5 (31%)                   | 0 (0%)                | 0.0598               |
| Invasive                 | 22 (81%)                  | 11 (69%)                  | 11 (100%)             |                      |
| <b>Intrinsic subtype</b> |                           |                           |                       |                      |
| Luminal                  | 18 (67%)                  | 13 (81%)                  | 5 (45%)               | 0.0969               |
| Triple-Negative          | 9 (33%)                   | 3 (19%)                   | 6 (55%)               |                      |
| <b>Size</b>              |                           |                           |                       |                      |
| <2 cm                    | 17 (63%)                  | 11 (69%)                  | 6 (55%)               | 0.4185               |
| ≥2 cm                    | 9 (33%)                   | 4 (25%)                   | 5 (45%)               |                      |
| na                       | 1                         | 1                         | -                     |                      |
| <b>Grade</b>             |                           |                           |                       |                      |
| 2                        | 15 (56%)                  | 10 (62%)                  | 5 (45%)               | 0.4517               |
| 3                        | 12 (44%)                  | 6 (38%)                   | 6 (55%)               |                      |
| <b>Lymph node</b>        |                           |                           |                       |                      |
| N neg                    | 16 (59%)                  | 11 (69%)                  | 5 (45%)               | 0.2638               |
| N pos                    | 11 (41%)                  | 5 (31%)                   | 6 (55%)               |                      |
